# Supplementary material
Source: publisher figshare collection journal article supplement (https://acs.figshare.com/ndownloader/files/4676638)
Supplement: Supplementary file 1 [file 4676638]

## Manuscript of Valérie Jullian

**Title:** Bolivianine, a new sesterpene with an unusual skeleton from *Hedyosmum angustifolium*, and its isomer, isobolivianine

### Supporting informations:

#### Spectra:

- p. S2: **Supporting information 1:**  $^1\text{H}$  spectra of Bolivianine 500 MHz,  $\text{C}_6\text{D}_6$
- p. S3: **Supporting information 2:**  $^{13}\text{C}$  spectra of Bolivianine, 125 MHz,  $\text{C}_6\text{D}_6$
- p. S4: **Supporting information 3:** HSQC spectra of Bolivianine  $\text{C}_6\text{D}_6$
- p. S5: **Supporting information 4:** COSY spectra of Bolivianine  $\text{C}_6\text{D}_6$  (enlargement of the most interesting part)
- p. S6: **Supporting information 5:** HMBC spectra of Bolivianine  $\text{C}_6\text{D}_6$
- p. S7: **Supporting information 6:** HMBC spectra of Bolivianine  $\text{C}_6\text{D}_6$  (enlargement)
- p. S8: **Supporting information 7:** NOESY spectra of Bolivianine  $\text{C}_6\text{D}_6$  (enlargement of the most interesting part)
- p. S9: **Supporting information 8:**  $^1\text{H}$  spectra of Isobolivianine 500 MHz,  $\text{CDCl}_3$  + TMS
- p. S10: **Supporting information 9:**  $^{13}\text{C}$  spectra of Isobolivianine, 125 MHz,  $\text{CDCl}_3$  +TMS
- p. S11: **Supporting information 10:** HSQC spectra of Isobolivianine  $\text{CDCl}_3$
- p. S12: **Supporting information 11:** COSY spectra of Isobolivianine  $\text{CDCl}_3$  (enlargement of the most interesting part)
- p. S13: **Supporting information 12:** HMBC spectra of Isobolivianine  $\text{CDCl}_3$
- p. S14: **Supporting information 13:** HMBC spectra of Isobolivianine  $\text{CDCl}_3$  (enlargement)
- p. S15: **Supporting information 14:** NOESY spectra of Isobolivianine  $\text{CDCl}_3$  (enlargement of the most interesting part)

#### Obtention of Bolivianine and Isobolivianine :

- p. S16: **Supporting information S15:** Purification scheme for Bolivianine, from 1 kg *H. angustifolium* trunk bark.
- p. S17: **Supporting information S16:** Experimental procedure for the isomerization of Bolivianine into Isobolivianine

**Supporting information S17:** Biological evaluation for Bolivianine (1) and isobolivianine (2)

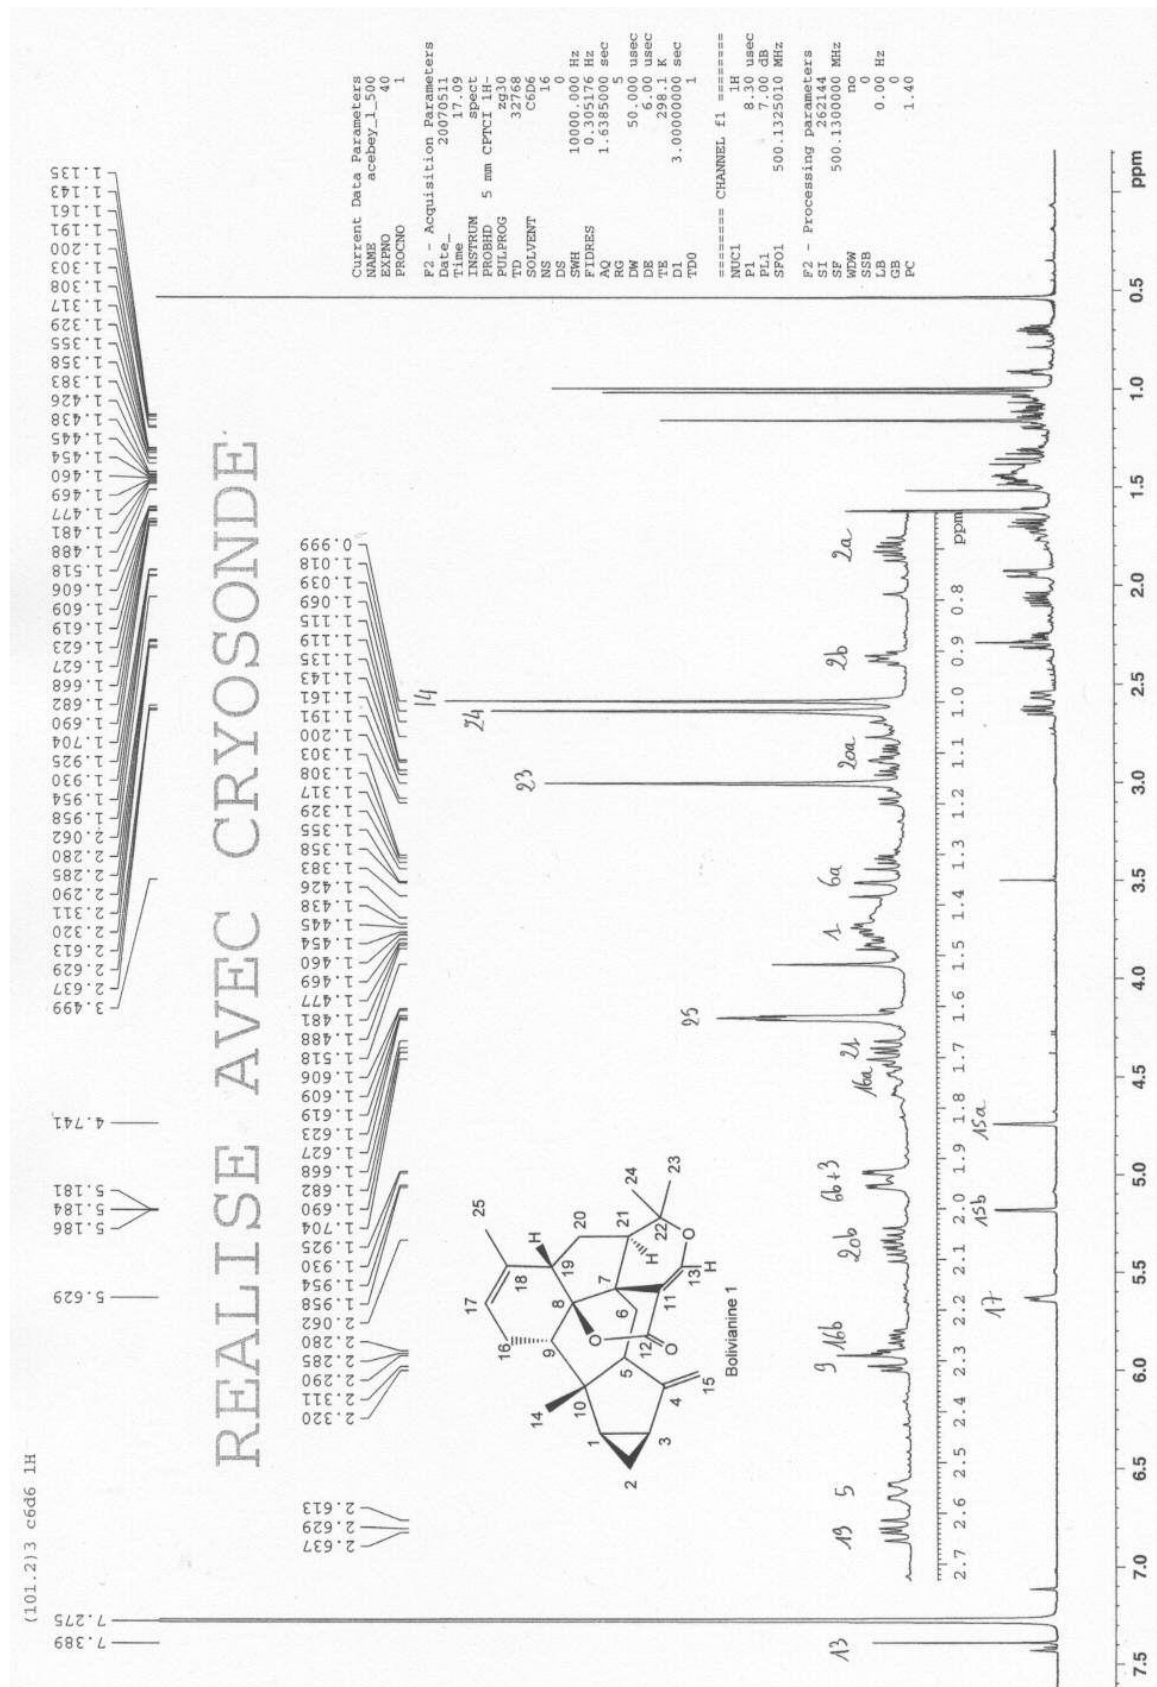

Supporting information 1:  $^1\text{H}$  Bolivianine 500 MHz,  $\text{C}_6\text{D}_6$

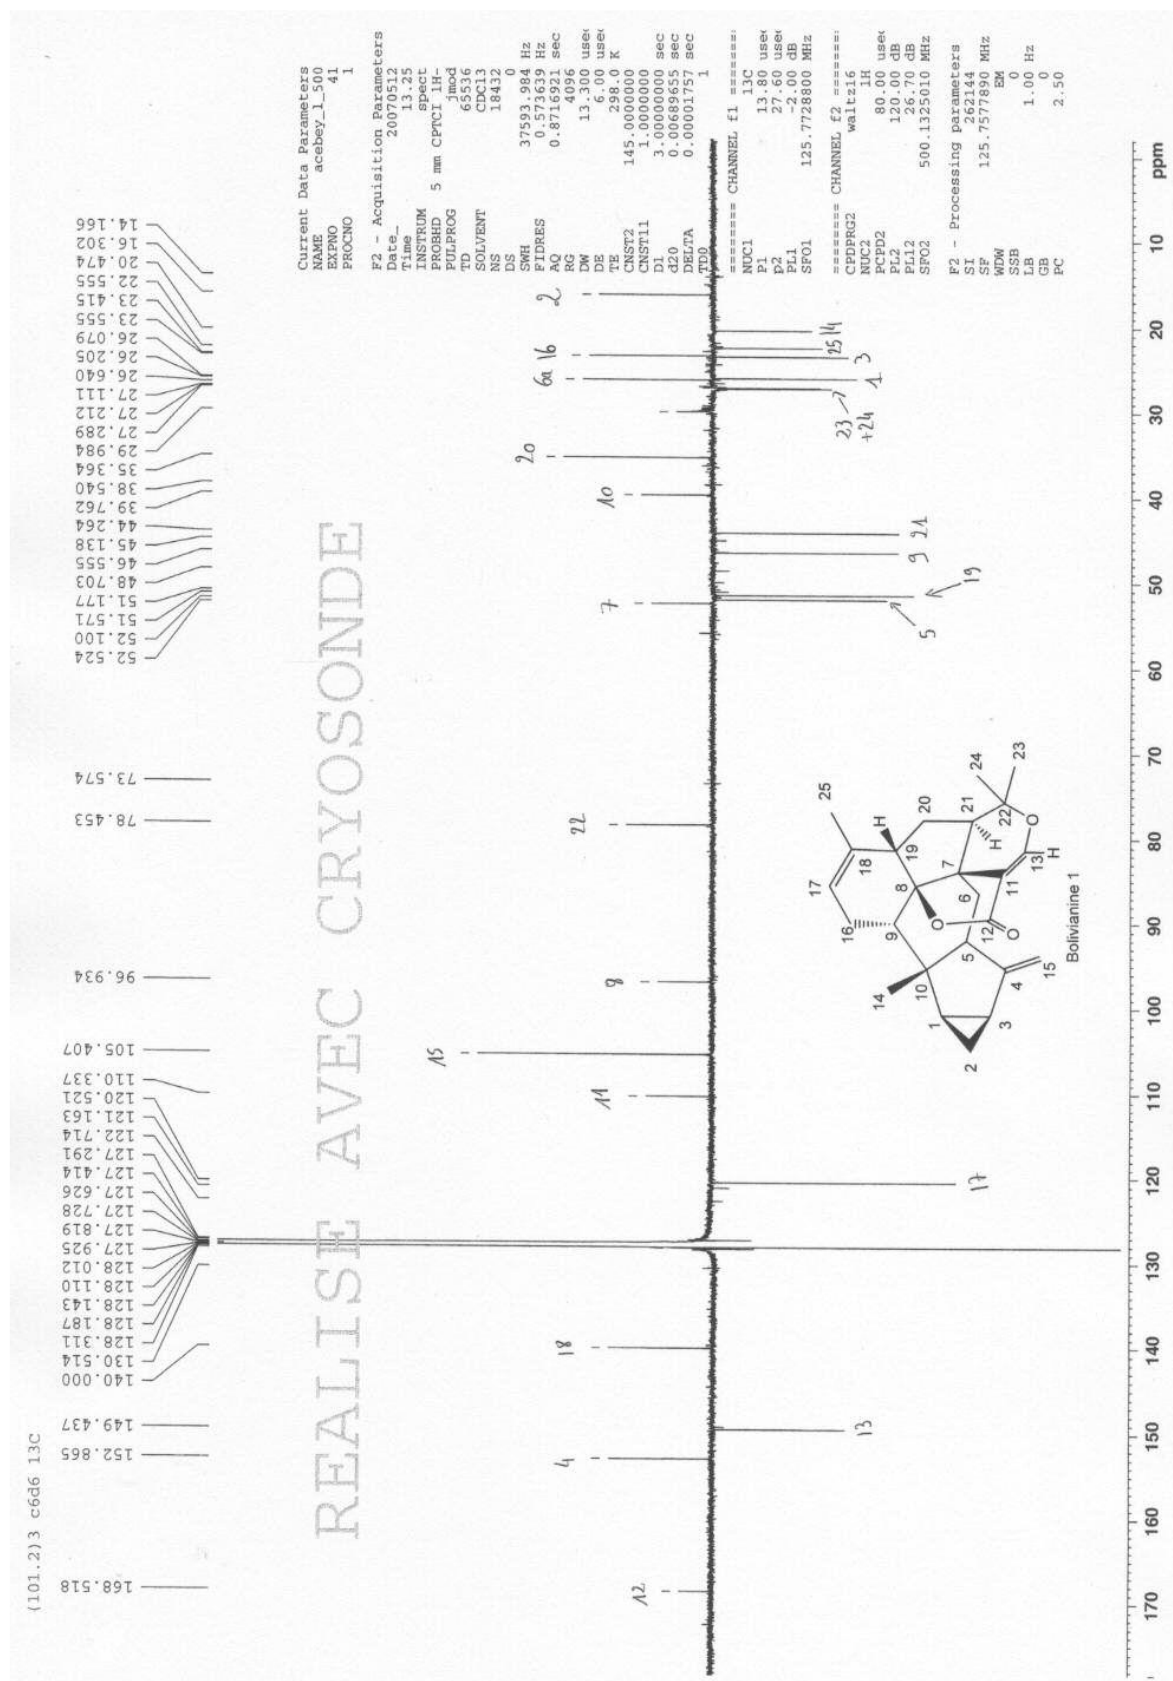

Supporting information 2:  $^{13}\text{C}$  spectra of Bolivianine, 125 MHz,  $\text{C}_6\text{D}_6$



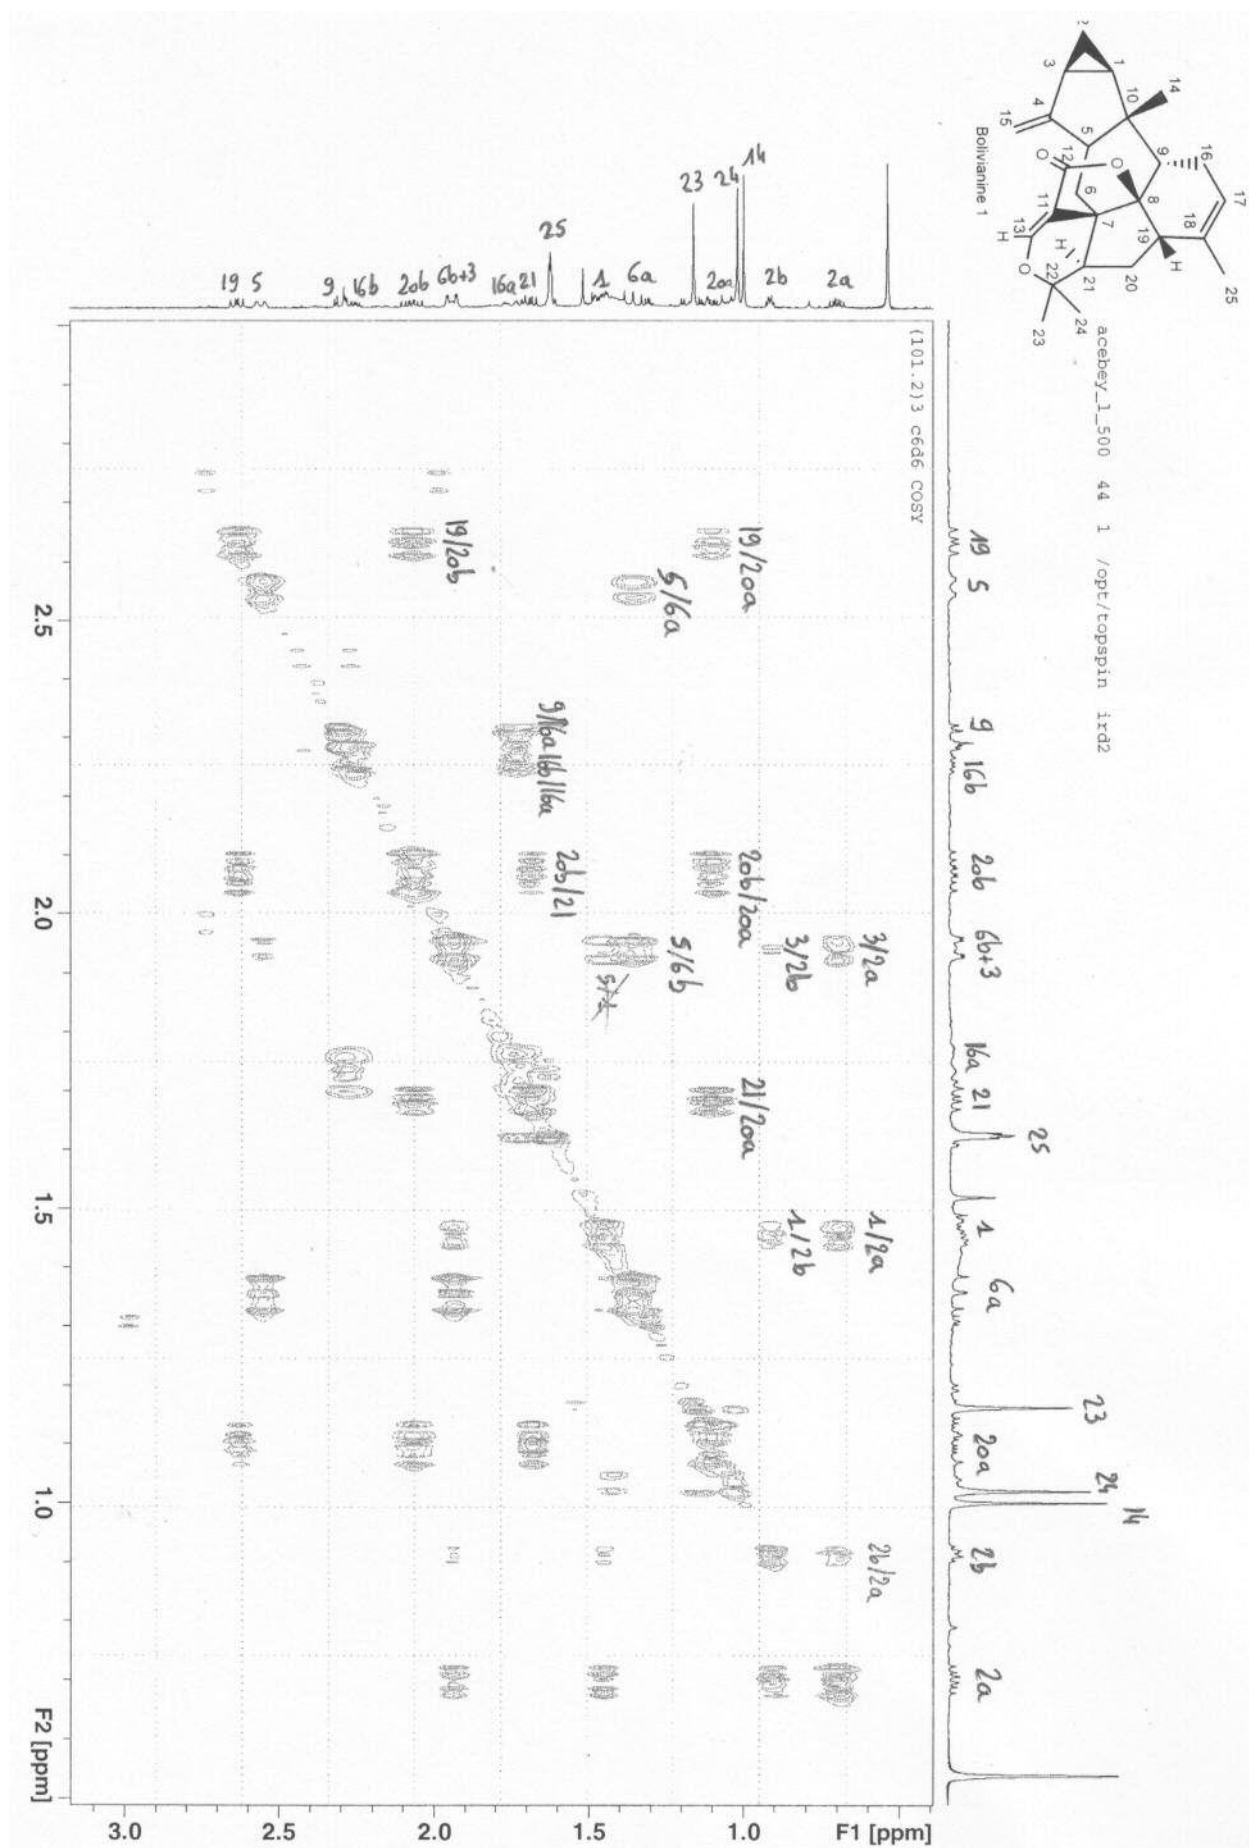

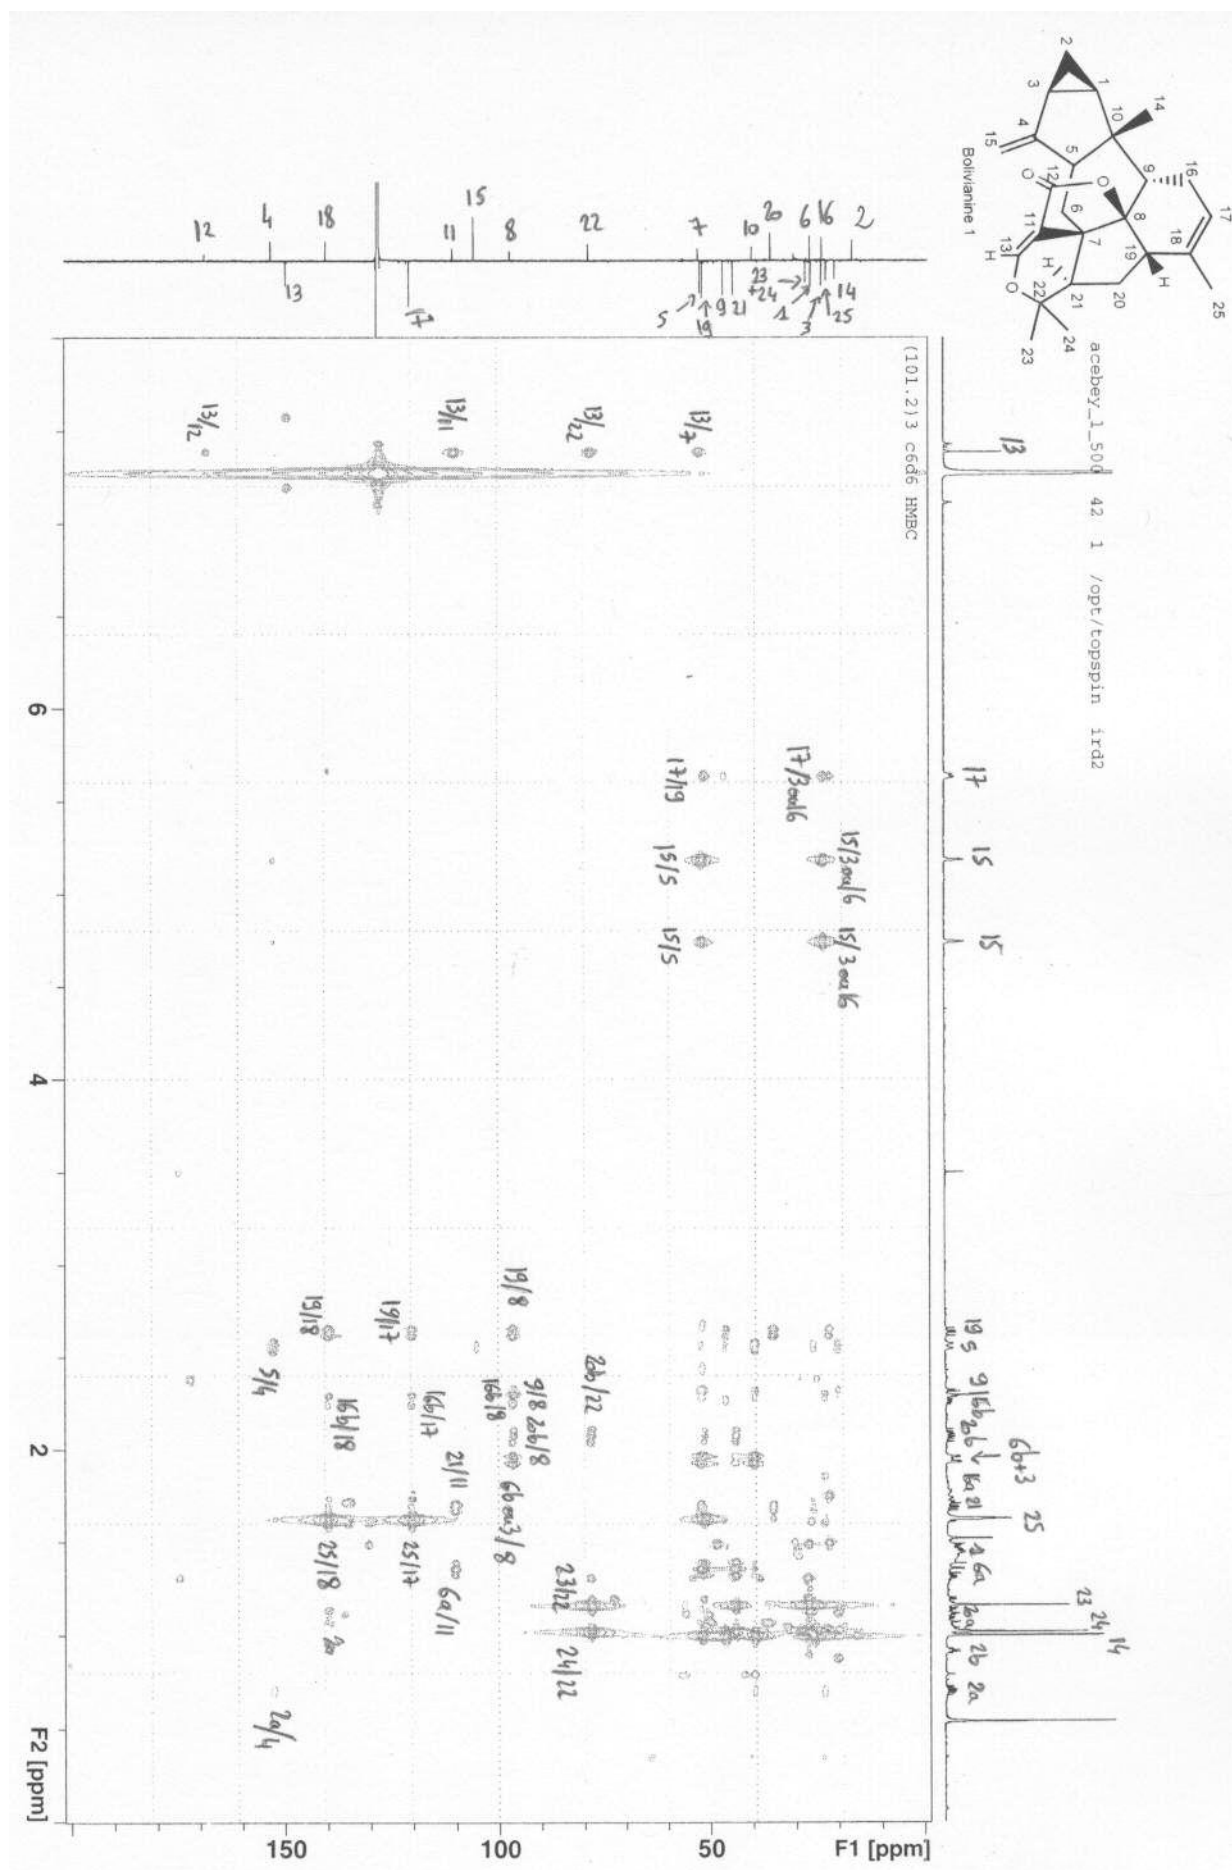

Supporting information 5: HMBC spectra of Bolivianine  $\text{C}_6\text{D}_6$









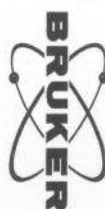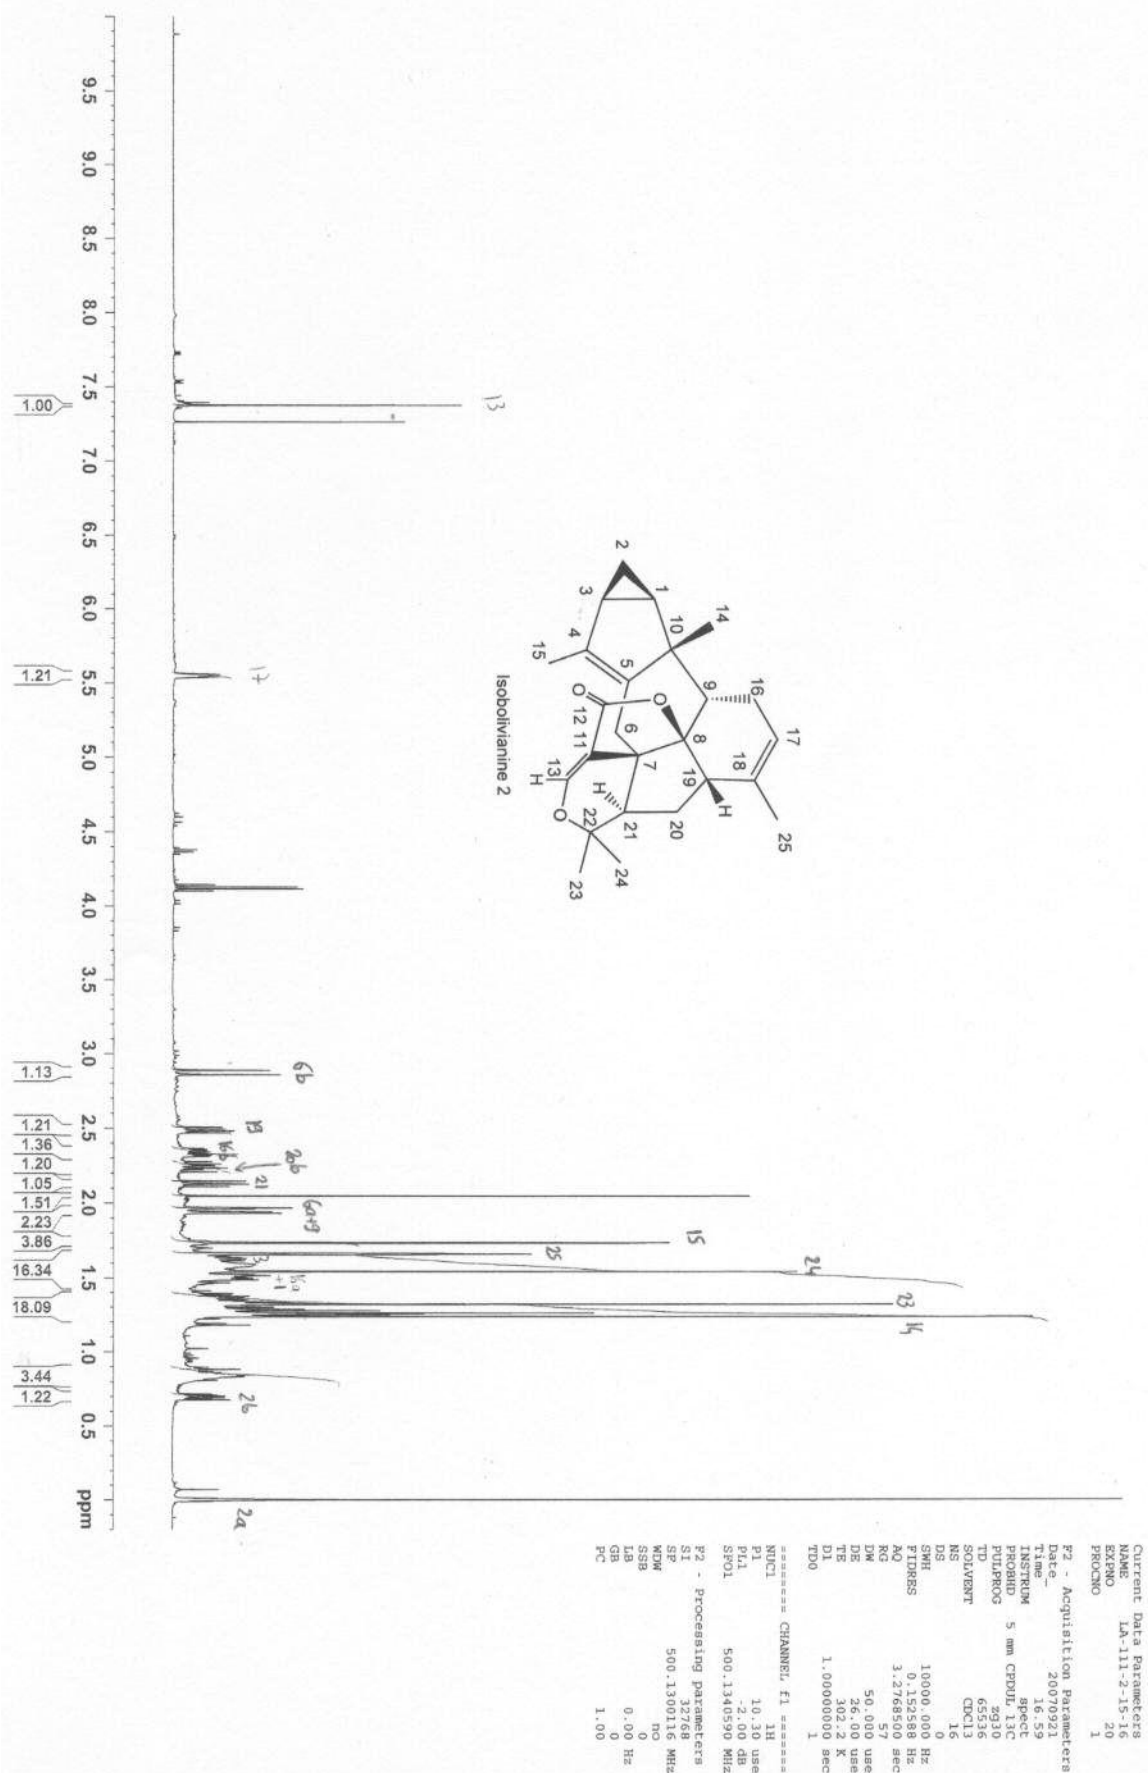Supporting information 8: <sup>1</sup>H spectra of Isobolivialanine 500 MHz, CDCl<sub>3</sub> + TMS

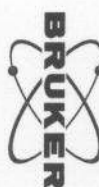

Current Data Parameters  
 NAME LA-111-2-15-16  
 EXPNO 22  
 PROCNO 1

F2 - Acquisition Parameters  
 Date\_ 20070921  
 Time 18.42

INSTRUM spect  
 PROBD 5 mm CPDUL 13C  
 PULPROG deptcgspep135.t4.be  
 TD 65536  
 SOLVENT CDC13  
 NS 2048

DS 4  
 SWH 29761.904 Hz  
 FIDRES 0.454131 Hz  
 AQ 1.1010548 sec  
 RG 2050  
 DW 16.800 use  
 DR 26.00 use  
 TR 302.2 K  
 CNST2 145.0000000 sec  
 D1 1.50000000 sec  
 d2 0.00344828 sec  
 d12 0.0002000 sec  
 D16 0.00015000 sec  
 DELTA 0.00001268 sec  
 DELTA1 0.00183238 sec  
 DELTA2 0.00181138 sec  
 DELTA3 0.00179828 sec  
 TD0 1

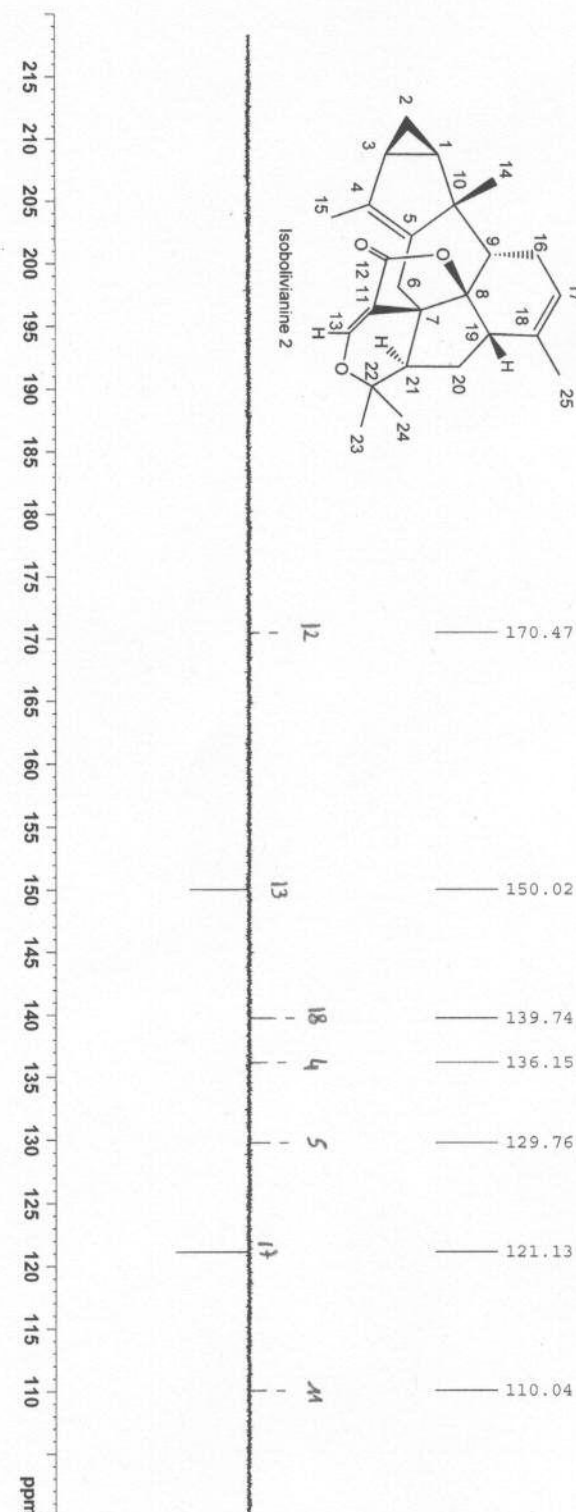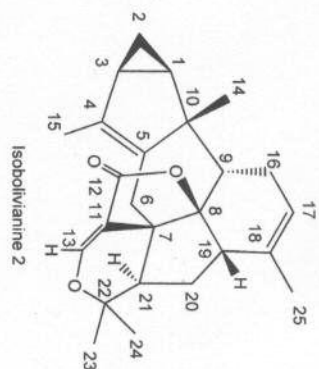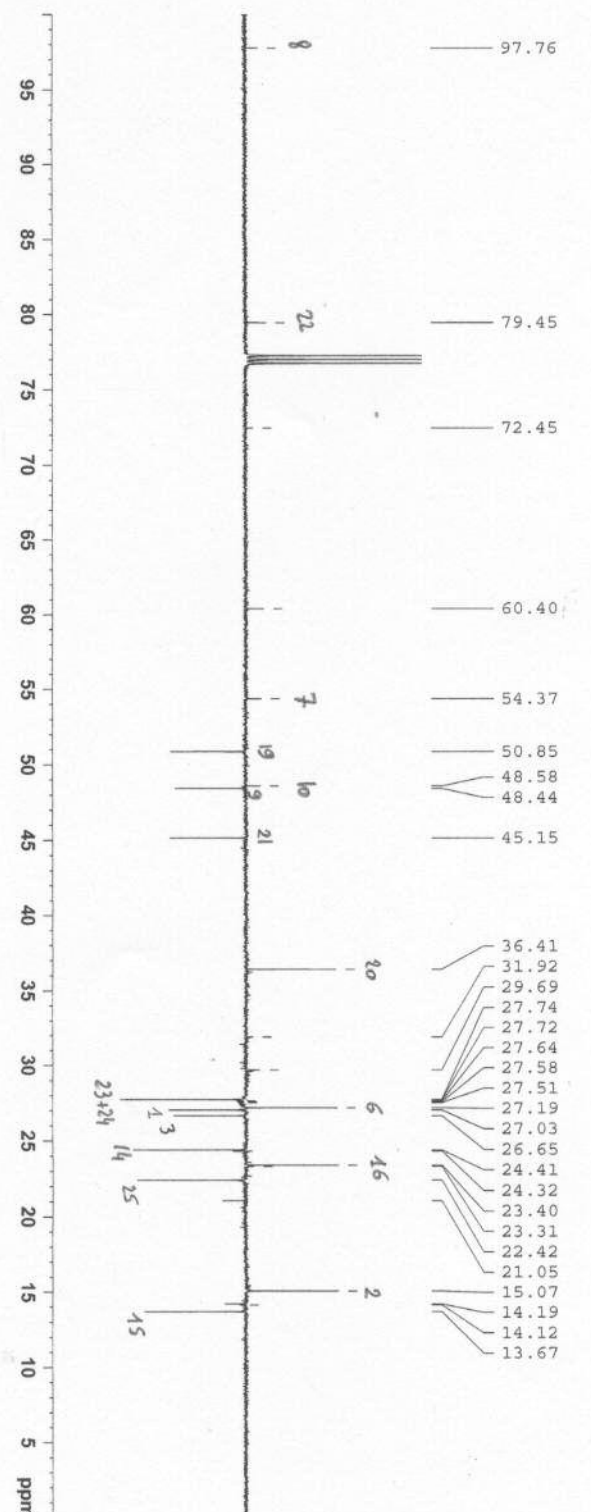

===== CHANNEL f1 =====  
 NUC1 13C  
 P1 13.10 use  
 P12 2000.00 use  
 P10 120.00 dB  
 P11 -4.00 dB  
 SFO1 125.7703640 MHz  
 SP2 1.88 dB  
 SPNAM2 C1p60comp14  
 SFOAL2 0.500  
 SFOFS2 0.00 Hz  
 ===== CHANNEL f2 =====  
 CPDPRG2 waltz64  
 NUC2 1H  
 P3 10.50 use  
 P4 21.00 use  
 PCPD2 60.00 use  
 P12 -2.00 dB  
 P112 15.50 dB  
 SFO2 500.1320000 MHz  
 ===== GRADIENT CHANNEL =====  
 GRNAM1 SINE.100  
 GRNAM2 SINE.100  
 GRNAM3 SINE.100  
 GP21 31.00 %  
 GP22 31.00 %  
 GP23 31.00 %  
 P16 1500.00 use  
 F2 - Processing parameters  
 SI 131072  
 SF 125.7577925 MHz  
 MDW EM  
 SSB 0  
 LB 0.70 Hz

Supporting information 9:  $^{13}\text{C}$  spectra of Isobolivanine, 125 MHz,  $\text{CDCl}_3$  + TMS

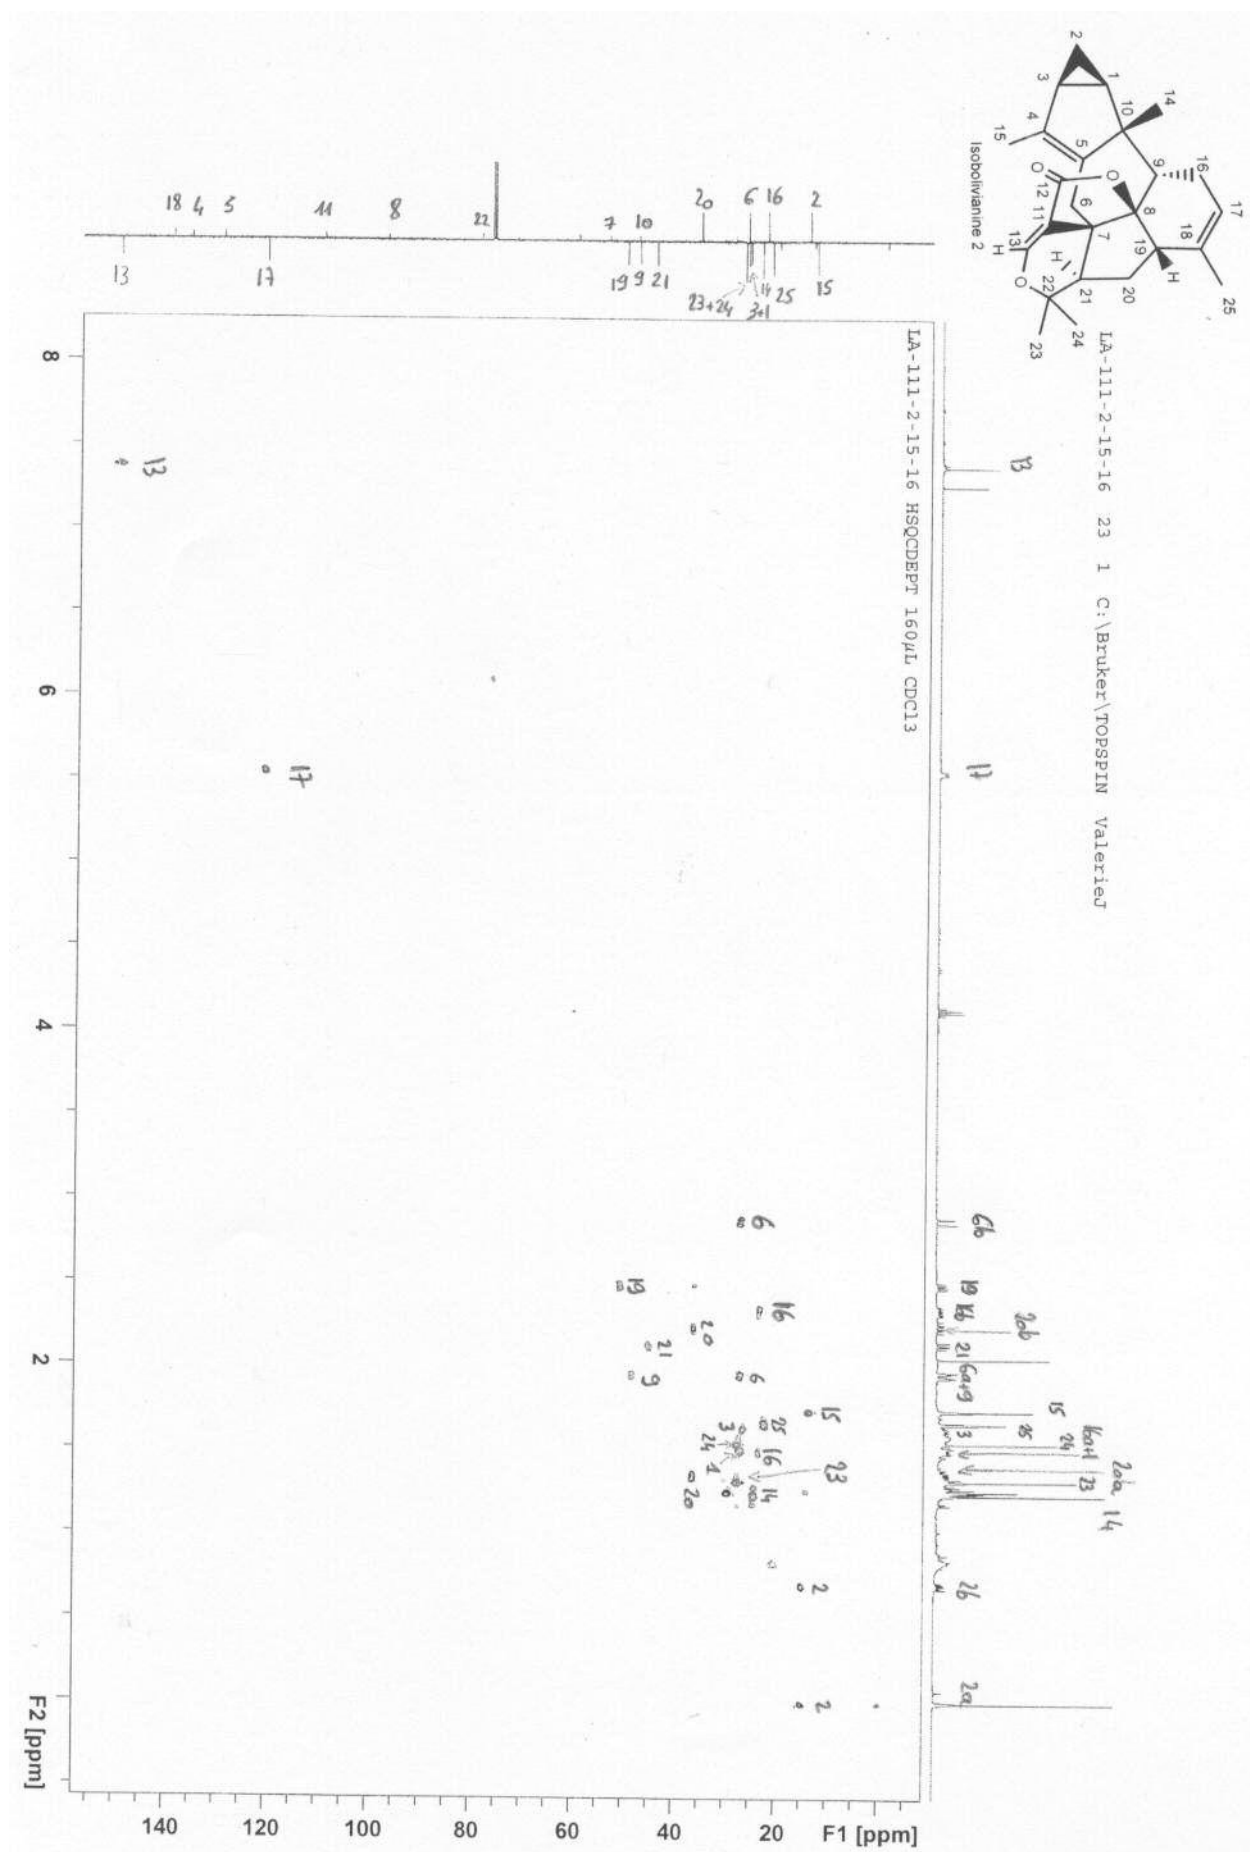



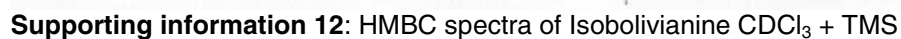

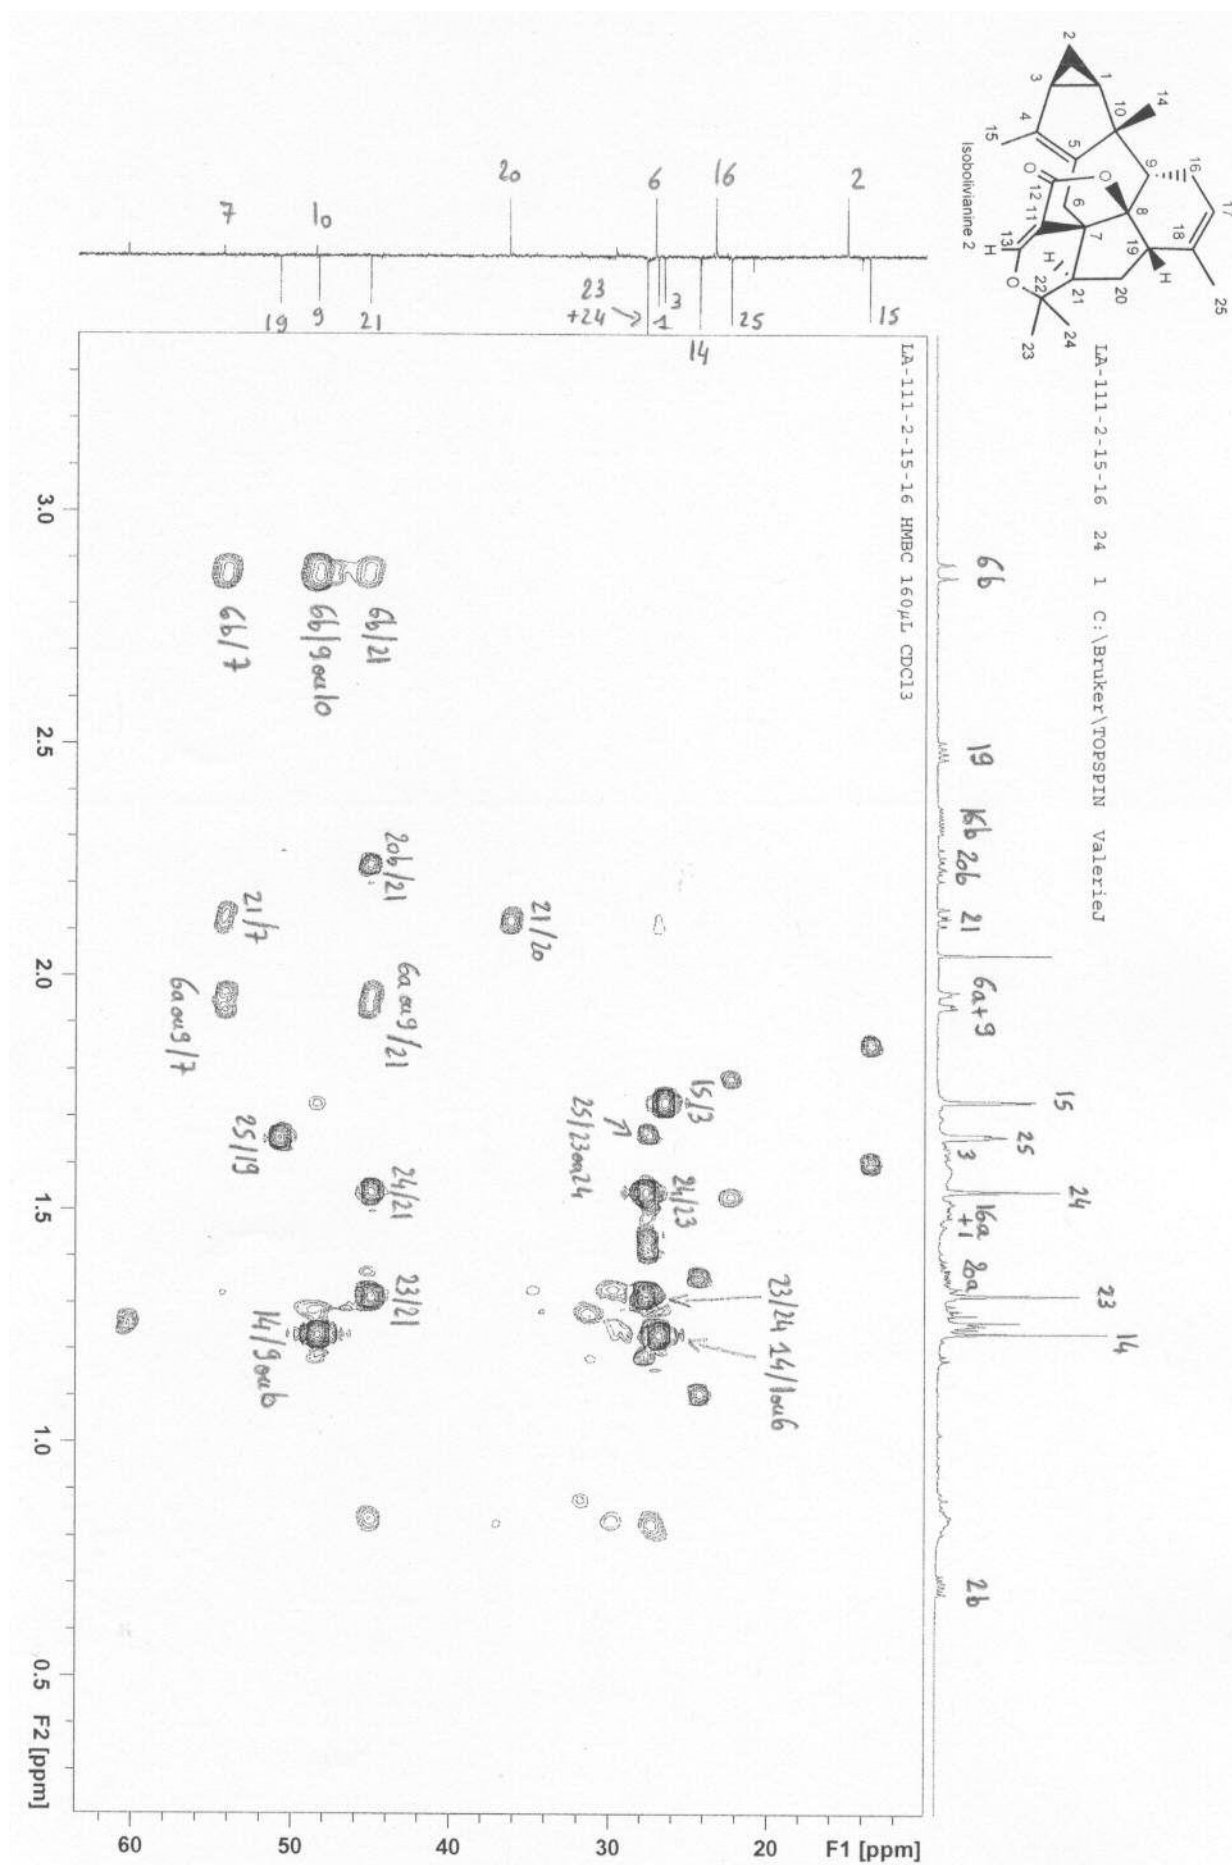





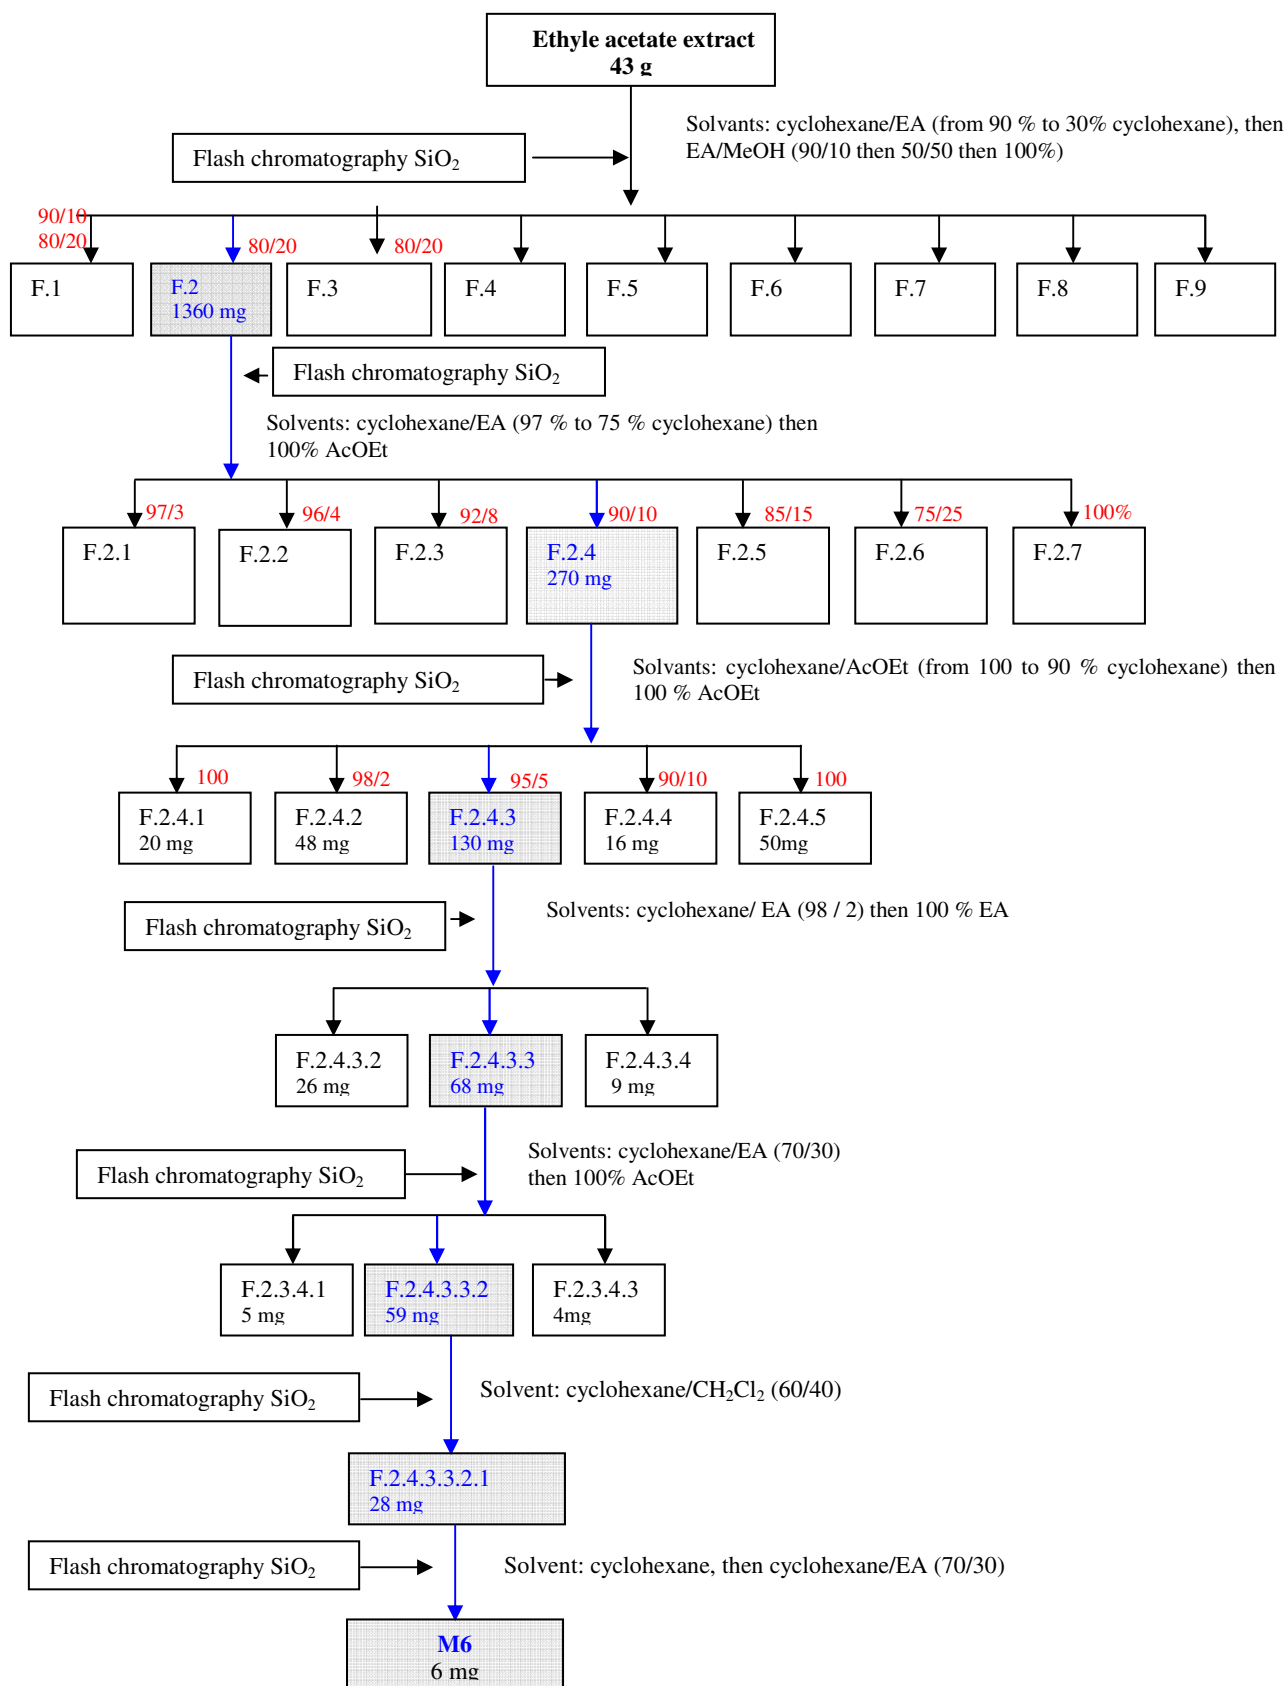

**Supporting information 15:** Purification scheme for Bolivianine, from 1Kg of *H. Angustifolium* trunk bark

**Supporting information 16:** Experimental procedure for the isomerization of bolivianine into isobolivianine

Bolivianine (2 mg) was dissolved in 600  $\mu$ L of deuterated chloroform. Then, the solvent was removed under reduced pressure at 40°C. After 18 hours, a mixture of 80% Isobolivianine and 20% Bolivianine was obtained. After 72 hours at 40°C, without solvent, under atmospheric pressure, the isomerization was complete. Isomerization rate was determined by  $^1\text{H}$  NMR. After flash column chromatography (1g of silica gel, eluted with cyclohexane, then cyclohexane/ ethyl acetate 40/60) 0.6 mg of isobolivianine were obtained.

**Supporting information 17:** Biological evaluation for bolivianine (1) and isobolivianine (2)

The biological evaluations were performed on *Plasmodium falciparum* culture in vitro, and on MCF7, a mammalian tumoral cell line, following previously published procedure<sup>1</sup>, and the results are summarized in the table T1

**Table T1:** Biological activities ( $\text{IC}_{50}$ ,  $\mu\text{M}$ ) of the sesterpenes (1) and (2)

|                  | <i>P. falciparum</i> (FCB1) | MCF7 Cell line |
|------------------|-----------------------------|----------------|
| <b>1</b>         | >60                         | 37             |
| <b>2</b>         | >60                         | 108            |
| CQ <sup>a</sup>  | 0.145                       |                |
| Dox <sup>b</sup> |                             | 0.4            |

<sup>a</sup> : CQ, chloroquine, positive control for *P. falciparum* inhibition

<sup>b</sup> : Dox, doxorubicine, positive control for MCF7 inhibition

(1) Jullian, V.; Bonduelle, C.; Valentin, A.; Acebey, L.; Duigou, A.-G.; Prevost, M.-F.; Sauvain, M. *Bioorganic & Medicinal Chemistry Letters* **2005**, 15, 5065-5070, and ref. cited.
